# Supplementary material
Source: publisher site journal article supplement (https://www.dovepress.com/article/559103)
Supplement: Supplementary file 1 [file 559103%20Supplementary%20Tables%201-3.docx]

**Supplementary Table 1**. Baseline characteristics

| Variables | Total, n = 1652 | Control, n = 616 | EGC, n = 509 | AGC, n = 527 | *P* value |
| --- | --- | --- | --- | --- | --- |
| Age | 59.9 ± 13.9 | 48.4 ± 13.0 | 67.3 ± 8.8a | 66.4 ± 9.4b | <0.001*** |
| Sex = Male (%) | 934 (56.5) | 254 (41.2) | 294 (57.8) a | 386 (73.2) b c | <0.001*** |
| AFP (ng/mL) | 15.9 ± 132.5 | 5.8 ± 14.8 | 5.6 ± 9.8 | 36.5 ± 232.4 b c | <0.001*** |
| CEA (ng/mL) | 10.3 ± 34.5 | 5.4 ± 14.6 | 5.7 ± 11.5 | 18.12 ± 55.4 b c | <0.001*** |
| CA125 (U/mL) | 20.8 ± 71.9 | 20.8 ± 109.1 | 18.9 ± 11.3 | 24.1 ± 40.5 | 0.071 |
| CA153 (U/mL) | 8.1 ± 7.1 | 8.1 ± 3.5 | 7.6 ± 3.1 a | 8.0 ± 11.4 | 0.432 |
| CA199 (U/mL) | 50.9 ± 187.2 | 22.9 ± 56.7 | 21.6 ± 95.1 | 100.2 ± 298.9 b c | <0.001*** |
| CA242 (U/mL) | 20.2 ± 34.5 | 11.5 ± 16.7 | 13.1 ± 16.1 | 30.3 ± 49.6 b c | <0.001*** |
| CA50 (U/mL) | 16.7 ± 33.6 | 10.5 ± 15.6 | 12.7 ± 14.5 | 24.8 ± 53.3 b | <0.001*** |
| CA724 (U/mL) | 9.3 ± 17.9 | 7.5 ± 16.0 | 7.5 ± 8.0 | 11.2 ± 23.8 b c | 0.01* |
| CRP (mg/L) | 6.1 ± 12.2 | 4.7 ± 5.4 | 5.0 ± 9.8 | 8.6 ± 17.9 b c | <0.001*** |
| WBC (10∧9/L) | 6.0 ± 4.1 | 6.2 ± 3.2 | 5.7 ± 1.8 a | 6.2 ± 6.1 | 0.056 |
| BASO_Count (10∧9/L) | 0.2 ± 6.5 | 0.0 ± 0.0 | 0.0 ± 0.1 | 0.5 ± 11.6 | 0.365 |
| BASO_Percent (%) | 0.1 ± 2.5 | 0.0 ± 0.4 | 0.2 ± 4.5 | 0.0 ± 0.1 | 0.373 |
| EO_Count (10∧9/L) | 0.1 ± 7.0 | 0.1 ± 1.5 | 0.1 ± 0.2 | 0.1 ± 0.3 | 0.342 |
| EO_Percent (%) | 0.0 ± 0.1 | 0.0 ± 0.0 | 0.0 ± 0.0 | 0.1 ± 0.2 | 0.146 |
| GRAN_Count (10∧9/L) | 3.8 ± 2.4 | 3.7 ± 3.1 | 3.8 ± 1.6 | 3.8 ± 2.5 | 0.351 |
| GRAN_Percent (%) | 1.1 ± 11.5 | 1.0 ± 11.5 | 1.4 ± 16.3 | 0.8 ± 2.0 | 0.718 |
| LYM_Count (10∧9/L) | 1.5 ± 1.1 | 1.6 ± 0.9 | 1.5 ± 0.6 | 1.4 ± 0.6 | 0.183 |
| LYM_Percent (%) | 0.4 ± 1.3 | 0.4 ± 1.3 | 0.3 ± 0.1 | 0.4 ± 1.7 | 0.211 |
| MONO_Count (10∧9/L) | 0.4 ± 0.3 | 0.4 ± 0.4 | 0.3 ± 0.1 | 0.4 ± 0.2 | 0.067 |
| MONO_Percent (%) | 0.1 ± 0.4 | 0.1 ± 0.2 | 0.1 ± 0.0 | 0.1 ± 0.6 | 0.169 |
| RBC (10∧12/L) | 4.3 ± 0.8 | 4.7 ± 0.8 | 4.3 ± 0.5 a | 3.9 ± 0.9 b c | <0.001*** |
| RDW (%) | 13.6 ± 3.4 | 13.1 ± 2.6 | 13.2 ± 4.4 | 14.5 ± 2.8 b c | <0.001*** |
| HCT (%) | 38.5 ± 6.7 | 41.2 ± 5.6 | 39.1 ± 4.5 a | 34.8 ± 7.9 b c | <0.001*** |
| HGB (g/L) | 127.9 ± 23.5 | 138.7 ± 18.7 | 130.8 ± 16.4 a | 112.7 ± 26.3 b c | <0.001*** |
| MCH (Pg) | 31.0 ± 19.8 | 32.0 ± 24.9 | 30.9 ± 12.9 | 30.1 ± 18.2 | 0.281 |
| MCHC (g/L) | 329.5 ± 24.3 | 330.2 ± 30.7 | 334.0 ± 12.2 a | 324.3 ± 23.6 b c | <0.001*** |
| MCV (fL) | 89.4 ± 7.7 | 89.4 ± 7.4 | 90.8 ± 5.0 | 88.0 ± 9.7 | 0.005** |
| MPV (fL) | 11.3 ± 12.7 | 11.3 ± 11.3 | 10.9 ± 1.3 | 11.6 ± 18.6 | 0.669 |
| PLT (10∧9/L) | 200.9 ± 70.0 | 213.6 ± 66.1 | 181.7 ± 64.7 a | 205.3 ± 75.4 b c | <0.001*** |
| TP (g/L) | 67.4 ± 10.9 | 70.8 ± 7.4 | 68.0 ± 14.6 a | 62.9 ± 8.3 b c | <0.001*** |
| ALB (g/L) | 40.6 ± 4.7 | 43.1 ± 3.1 | 40.9 ± 4.1 a | 37.3 ± 5.0 b c | <0.001*** |
| GLB (g/L) | 27.4 ± 16.7 | 28.5 ± 14.9 | 27.9 ± 24.5 | 25.6 ± 4.9 b c | 0.011* |
| A/G | 1.6 ± 0.7 | 1.6 ± 0.2 | 1.6 ± 1.1 | 1.5 ± 0.3 | 0.129 |
| PAB (mg/L) | 263.4 ± 72.3 | 286.3 ± 64.4 | 265.7 ± 67.9 a | 234.4 ± 74.7 b c | <0.001*** |
| ALT (U/L) | 25.9 ± 21.5 | 27.9 ± 25.5 | 24.7 ± 17.2 | 24.6 ± 19.4 | 0.058 |
| AST (U/L) | 23.9 ± 24.2 | 25.0 ± 33.0 | 23.2 ± 10.7 | 23.1 ± 21.2 | 0.306 |
| ALT/AST | 1.3 ± 2.6 | 1.3 ± 1.9 | 1.3 ± 4.1 | 1.3 ± 1.4 | 0.088 |
| TBIL (µmol/L) | 14.0 ± 12.14 | 14.0 ± 5.4 | 14.1 ± 5.5 | 14.0 ± 20.0 | 0.986 |
| DBIL (µmol/L) | 4.6 ± 8.7 | 4.2 ± 2.0 | 4.5 ± 1.9 | 5.2 ± 15.1 | 0.147 |
| IBIL (µmol/L) | 9.8 ± 5.0 | 10.1 ± 4.9 | 9.7 ± 3.9 | 9.8 ± 5.9 | 0.132 |
| DBIL/TBIL | 0.4 ± 0.8 | 0.3 ± 0.4 | 0.3 ± 0.1 | 0.4 ± 1.4 | 0.128 |
| ADA (U/L) | 11.8 ± 4.4 | 11.1 ± 3.5 | 12.3 ± 4.7 a | 12.0 ± 4.9 b | <0.001*** |
| AFU (U/L) | 20.1 ± 4.8 | 21.1 ± 5.7 | 19.0 ± 3.5 a | 19.0 ± 4.5 b | <0.001*** |
| ALP (U/L) | 75.9 ± 49.8 | 68.0 ± 24.1 | 76.2 ± 26.2 a | 84.7 ± 79.4b c | <0.001*** |
| GGT (U/L) | 29.5 ± 42.0 | 30.9 ± 38.1 | 28.6 ± 32.1 | 28.8 ± 53.3 | 0.587 |
| CG (mg/L) | 1.6 ± 1.1 | 1.5 ± 1.2 | 1.7 ± 0.6 | 1.8 ± 1.5 | 0.325 |
| GR (U/L) | 35.7 ± 2.7 | 34.4 ± 2.5 | 36.8 ± 2.1 a | 38.4 ± 3.8 b c | <0.001*** |
| TBA (µmol/L) | 6.9 ± 12.7 | 5.6 ± 7.5 | 7.0 ± 13.8a | 8.2 ± 15.8 b | 0.006** |
| BUN (mmol/L) | 6.9 ± 22.2 | 7.9 ± 36.0 | 5.7 ± 3.6 | 5.7 ± 2.5 | 0.066 |
| CO2CP (mmol/L) | 27.0 ± 5.3 | 27.6 ± 4.8 | 27.4 ± 7.9 | 27.2 ± 3.2 | 0.122 |
| CREA (µmol/L) | 66.2 ± 18.0 | 61.6 ± 14.4 | 68.0 ± 19.6 a | 69.7 ± 19.0 b | <0.001*** |
| CYS.C (mg/L) | 0.9 ± 0.2 | 0.9 ± 0.2 | 0.9 ± 0.1 | 0.9 ± 0.3 | 0.594 |
| eGFR | 95.9 ± 11.2 | 103.2 ± 8.7 | 91.9 ± 9.7 a | 90.7 ± 10.6 b c | <0.001*** |
| GLU (mmol/L) | 6.1 ± 10.1 | 5.8 ± 6.9 | 6.4 ± 15.4 | 6.1 ± 5.8 | 0.629 |
| RBP (mg/L) | 40.8 ± 7.0 | 41.9 ± 5.6 | 40.4 ± 8.0 | 40.1 ± 8.4 | 0.256 |
| UA (µmol/L) | 314.3 ± 89.6 | 319.5 ± 89.5 | 324.8 ± 93.2 | 298.1 ± 83.8 b c | <0.001*** |
| CK (U/L) | 109.2 ± 83.2 | 110.2 ± 60.4 | 108.4 ± 76.2 | 108.7 ± 113.6 | 0.337 |
| CKMB (U/L) | 7.5 ± 0.6 | 7.5 ± 0.5 | 7.6 ± 0.7 | 7.3 ± 0.6 | 0.172 |
| HBDH (U/L) | 151.9 ± 14.3 | 157.2 ± 10.9 | 154.7 ± 16.4 | 152.1 ± 14.0 | 0.860 |
| LDH.L (U/L) | 182.7 ± 84.3 | 189.6 ± 45.6 | 186.8 ± 131.5 | 176.2 ± 54.3 | 0.096 |
| m.AST (U/L) | 12.6 ± 11.7 | 11.7 ± 8.5 | 11.6 ± 16.0 | 13.8 ± 9.4 | 0.079 |
| TG (mmol/L) | 1.9 ± 3.8 | 1.6 ± 1.4 | 1.9 ± 5.8 | 1.9 ± 3.1 | 0.155 |
| CHOL (mmol/L) | 5.1 ± 7.3 | 4.8 ± 0.9 | 5.8 ± 12.8 | 4.9 ± 2.6 | 0.051 |
| APO.A1 (g/L) | 1.4 ± 0.4 | 1.5 ± 0.4 | 1.4 ± 0.2 a | 1.3 ± 0.3 b c | <0.001*** |
| APO.B (g/L) | 1.6 ± 9.0 | 2.0 ± 14.5 | 1.1 ± 1.4 | 1.4 ± 2.6 | 0.200 |
| HDL.C (mmol/L) | 1.5 ± 2.0 | 1.7 ± 2.6 | 1.3 ± 0.6 a | 1.4 ± 2.0 b | 0.001** |
| LDL.C (mmol/L) | 3.7 ± 10.3 | 3.3 ± 7.1 | 2.8 ± 2.0 | 4.8 ± 16.3 | 0.053 |
| Na (mmol/L) | 139.2 ± 11.6 | 140.1 ± 5.3 | 139.4 ± 16.4 | 139.1 ± 11.0 | 0.286 |
| P (mmol/L) | 5.4 ± 19.6 | 5.2 ± 21.1 | 5.5 ± 26.9 | 5.1 ± 13.1 | 0.156 |
| K (mmol/L) | 4.3 ± 4.2 | 4.4 ± 1.3 | 4.3 ± 0.4 | 4.4 ± 7.2 | 0.265 |
| Cl (mmol/L) | 103.0 ± 4.6 | 102.8 ± 2.5 | 103.0 ± 6.8 | 103.2 ± 3.7 | 0.159 |
| Ca (mmol/L) | 3.3 ± 6.8 | 3.3 ± 3.2 | 3.3 ± 9.2 | 3.1 ± 7.3 | 0.756 |
| AMY (U/L) | 62.7 ± 21.6 | 63.5 ± 21.0 | 61.7 ± 22.0 | 62.1 ± 22.0 | 0.059 |

Mean ± SD/n (%).

Representative with statistical significance. * *P*<0.05, ** *P*<0.01, ****P*<0.001.

“a” means *P*< 0.05 vs control, “b” means *P*< 0.05 vs control, “c” means *P*< 0.05 vs EGC group.

A/G, albumin/globulin; PAB , prealbumin; ALT, alanine aminotransferase; AST, aspartate aminotransferase; ALT/AST, alanine aminotransferase / aspartate aminotransferase; TBIL, total bilirubin; DBIL , direct bilirubin; IBIL, indirect bilirubin; DBIL/TBIL , direct bilirubin / total bilirubin; ADA, adenosine deaminase; AFU, α-L-fucosidase; ALP, alkaline posphatase; GGT , γ-glutamyltransferase; CG, cholyglycine; GR, glutathione reductase; TBA, total bile acid; BUN , urea nitrogen; CO2CP, carbon dioxide combining power; CREA , serum creatinine; CYS.C, cystatin C; eGFR , estimated glomerular filtration rate; GLU , glucose; RBP , retinol-binding protein; UA, uric acid; CK , creatine kinase; CKMB, creatine kinase MB isoenzyme; HBDH , α-hydroxybutyrate dehydrogenase; LDH.L, lactate dehydrogenase; m.AST , alanine aminotransferase isoenzyme; TG , triglyeride; CHOL , total cholesterol; APO.AⅠ, apolipoprotein AⅠ; APO.B, apolipoprotein B; HDL.C , high density lipoprotein; LDL.C, low density lipoprotein; Na, natrium; P, phosphonium; K , kalium; Cl , chlorine; Ca , calcium; AMY, amylase.

**Supplementary Table 2**. The multiple testing correction for the 75 variables tested in risk factor analysis.

| Variables | Odds_Ratio | CI_Lower | CI_Upper | P_Value | FDR_Adjusted_P | Significant |
| --- | --- | --- | --- | --- | --- | --- |
| Age | 1.100895454 | 1.059460782 | 1.146355315 | 1.66E-06 | 4.19E-05 | TRUE |
| Sex-Female (%) |  |  |  |  |  |  |
| Sex-Male (%) | 5.456315467 | 3.079783774 | 9.927576961 | 1.23E-08 | 4.69E-07 | TRUE |
| AFP (ng/mL) | 1.009245457 | 0.982767079 | 1.035762217 | 0.48933 | 0.84520678 | FALSE |
| CEA (ng/mL) | 0.994335428 | 0.943656032 | 1.049914677 | 0.836893 | 0.963695024 | FALSE |
| CA125 (U/mL) | 0.947385012 | 0.917263322 | 0.973041602 | 0.000326 | 0.00495881 | TRUE |
| CA153 (U/mL) | 1.006458553 | 0.913614442 | 1.108157075 | 0.895824 | 0.985386158 | FALSE |
| CA199 (U/mL) | 0.998311864 | 0.994649 | 1.005531995 | 0.423331 | 0.784710703 | FALSE |
| CA242 (U/mL) | 1.099575235 | 1.053659911 | 1.149000695 | 1.66E-05 | 0.000316059 | TRUE |
| CA50 (U/mL) | 0.935839599 | 0.88685115 | 0.990814282 | 0.018659 | 0.094998874 | FALSE |
| CA724 (U/mL) | 1.00583842 | 0.97435451 | 1.021451758 | 0.523928 | 0.849667543 | FALSE |
| CRP (mg/L) | 0.999381034 | 0.965752059 | 1.036113902 | 0.972421 | 0.985386158 | FALSE |
| WBC (10∧9/L) | 1.658774017 | 0.992281121 | 2.702683234 | 0.046675 | 0.168919208 | FALSE |
| BASO_Count (10∧9/L) | 0.378212078 | 0.049978161 | 38.91350504 | 0.412539 | 0.783824793 | FALSE |
| BASO_Percent (%) | 1.885670884 | 1.100831696 | 252127.9031 | 0.815968 | 0.959534513 | FALSE |
| EO_Count (10∧9/L) | 0.304261875 | 0.012558061 | 0.542436226 | 0.256256 | 0.62824074 | FALSE |
| EO_Percent (%) | 42.12771046 | 1.24E-05 | 58071567151 | 0.674985 | 0.900035246 | FALSE |
| GRAN_Count (10∧9/L) | 0.837585167 | 0.495612181 | 1.499684112 | 0.525452 | 0.849667543 | FALSE |
| GRAN_Percent (%) | 1.003888023 | 0.983964279 | NA | 0.90305 | 0.985386158 | FALSE |
| LYM_Count (10∧9/L) | 0.539168093 | 0.230182877 | 1.462487665 | 0.184023 | 0.482266588 | FALSE |
| LYM_Percent (%) | 0.296466639 | 0.00160247 | 27.4556122 | 0.605187 | 0.88491082 | FALSE |
| MONO_Count (10∧9/L) | 0.387083223 | 0.005097098 | 29.05994266 | 0.667209 | 0.900035246 | FALSE |
| MONO_Percent (%) | 1.32E-05 | 1.56E-16 | 2019168.842 | 0.386563 | 0.773126889 | FALSE |
| RBC (10∧12/L) | 0.806499295 | 0.015636038 | 62.11632478 | 0.912807 | 0.985386158 | FALSE |
| RDW (%) | 0.946682614 | 0.903267349 | 1.052148344 | 0.044601 | 0.168919208 | FALSE |
| HCT (%) | 0.901879097 | 0.522785382 | 1.555848192 | 0.710367 | 0.900035246 | FALSE |
| HGB (g/L) | 0.997010012 | 0.884035561 | 1.142680993 | 0.962082 | 0.985386158 | FALSE |
| MCH (Pg) | 1.46378728 | 1.053234202 | 3.76416024 | 0.169868 | 0.468141316 | FALSE |
| MCHC (g/L) | 0.986701911 | 0.903624579 | 1.051769994 | 0.703065 | 0.900035246 | FALSE |
| MCV (fL) | 0.911782601 | 0.77479022 | 1.181746577 | 0.478652 | 0.84520678 | FALSE |
| MPV (fL) | 0.939243288 | 0.743175228 | 1.186384888 | 0.598628 | 0.88491082 | FALSE |
| PLT (10∧9/L) | 0.998759713 | 0.993076708 | 1.004712186 | 0.680516 | 0.900035246 | FALSE |
| TP (g/L) | 0.98035397 | 0.952688516 | 1.120806025 | 0.781104 | 0.959534513 | FALSE |
| ALB (g/L) | 0.948706814 | 0.744313116 | 1.139391595 | 0.678027 | 0.900035246 | FALSE |
| GLB (g/L) | 0.994210836 | 0.980247961 | 1.039849496 | 0.605465 | 0.88491082 | FALSE |
| A/G | 4.085884674 | 0.820707081 | 64.80473347 | 0.312041 | 0.658754223 | FALSE |
| PAB (mg/L) | 1.000030846 | 0.995037098 | 1.005055593 | 0.990358 | 0.990358246 | FALSE |
| ALT (U/L) | 1.052680438 | 1.018704875 | 1.087554403 | 0.021511 | 0.05816179 | FALSE |
| AST (U/L) | 0.964075696 | 0.929227489 | 0.996685162 | 0.040404 | 0.161616439 | FALSE |
| ALT/AST | 1.388334084 | 1.235950178 | 2.57032633 | 0.289957 | 0.648140085 | FALSE |
| TBIL (µmol/L) | 0.805084481 | 0.630756551 | 0.963384238 | 0.036781 | 0.161616439 | FALSE |
| DBIL (µmol/L) | 1.114007239 | 0.772770408 | 1.682935034 | 0.578437 | 0.88491082 | FALSE |
| IBIL (µmol/L) | 1.250726342 | 1.017312398 | 1.580005955 | 0.039412 | 0.161616439 | FALSE |
| DBIL/TBIL | 29.21656626 | 0.054010689 | 14042.6219 | 0.282255 | 0.648140085 | FALSE |
| ADA (U/L) | 0.996442737 | 0.920120733 | 1.081261115 | 0.931065 | 0.985386158 | FALSE |
| AFU | 0.86328471 | 0.777090016 | 0.953500145 | 0.005157 | 0.038413524 | TRUE |
| ALP (U/L) | 1.014702188 | 1.002646805 | 1.027353866 | 0.01875 | 0.094998874 | FALSE |
| GGT (U/L) | 0.996326492 | 0.985043765 | 1.007423347 | 0.520539 | 0.849667543 | FALSE |
| CG (mg/L) | 1.025363886 | 0.583344517 | 1.260316953 | 0.881343 | 0.985386158 | FALSE |
| GR (U/L) | 0.742385196 | 0.599201699 | 0.913739377 | 0.00556 | 0.038413524 | TRUE |
| TBA (µmol/L) | 0.995156428 | 0.969118026 | 1.024078067 | 0.710554 | 0.900035246 | FALSE |
| BUN (mmol/L) | 0.935154228 | 0.808194201 | 1.021099371 | 0.320968 | 0.659286027 | FALSE |
| CO2CP (mmol/L) | 1.16142595 | 1.014479206 | 1.333365593 | 0.031478 | 0.149520147 | FALSE |
| CREA (µmol/L) | 0.961728669 | 0.937905389 | 0.985170225 | 0.001841 | 0.017491146 | TRUE |
| CYS.C (mg/L) | 1.078278799 | 0.024068449 | 43.36298721 | 0.968382 | 0.985386158 | FALSE |
| eGFR | 0.913111177 | 0.853265205 | 0.973648799 | 0.006794 | 0.043026216 | TRUE |
| GLU (mmol/L) | 0.983263398 | 0.967143007 | 1.009591184 | 0.057536 | 0.190118926 | FALSE |
| RBP (mg/L) | 0.985749148 | 0.878232462 | 1.104534377 | 0.804308 | 0.959534513 | FALSE |
| UA (µmol/L) | 0.997660009 | 0.99422744 | 1.0009984 | 0.172473 | 0.468141316 | FALSE |
| CK (U/L) | 1.003400841 | 0.996859586 | 1.009864276 | 0.305012 | 0.658754223 | FALSE |
| CKMB (U/L) | 0.409620153 | 0.18536312 | 1.061549855 | 0.923091 | 0.851902424 | FALSE |
| HBDH (U/L) | 0.967897544 | 0.929813772 | 1.009351207 | 0.117148 | 0.342431835 | FALSE |
| LDH.L (U/L) | 1.012532431 | 1.003572803 | 1.022837188 | 0.009582 | 0.056020314 | FALSE |
| m.AST (U/L) | 0.98021516 | 0.910893032 | 1.052944991 | 0.588259 | 0.88491082 | FALSE |
| TG (mmol/L) | 1.057045843 | 0.958373929 | 1.328000771 | 0.618486 | 0.886886239 | FALSE |
| CHOL (mmol/L) | 1.417036826 | 1.143120522 | 2.024108564 | 0.050723 | 0.175225251 | FALSE |
| APO.A1 (g/L) | 0.064388925 | 0.01329412 | 0.288047297 | 0.000492 | 0.00622936 | TRUE |
| APO.B (g/L) | 1.402592757 | 1.191376164 | 2.90606284 | 0.28564 | 0.648140085 | FALSE |
| HDL.C (mmol/L) | 0.707729502 | 0.305279917 | 1.360628 | 0.410162 | 0.783824793 | FALSE |
| LDL.C (mmol/L) | 1.007794397 | 0.87993248 | 1.065977289 | 0.820655 | 0.959534513 | FALSE |
| Na (mmol/L) | 0.955424651 | 0.844424293 | 1.022469627 | 0.444385 | 0.804125662 | FALSE |
| P (mmol/L) | 0.997635898 | 0.979075119 | 1.017212616 | 0.79357 | 0.959534513 | FALSE |
| K (mmol/L) | 0.660826863 | 0.316114382 | 1.307261115 | 0.250319 | 0.62824074 | FALSE |
| Cl (mmol/L) | 0.955322339 | 0.886238752 | 1.001999985 | 0.080454 | 0.244580825 | FALSE |
| Ca (mmol/L) | 1.047073446 | 0.995505408 | 1.129917881 | 0.077548 | 0.244580825 | FALSE |
| AMY (U/L) | 1.000491962 | 0.984680401 | 1.01734211 | 0.952923 | 0.985386158 | FALSE |

**Supplementary Table 3**. The multiple comparison corrections for Table 5.

| Name | Desc | Odds_Ratio | CI_Lower | CI_Upper | P_Value | FDR_Adjusted_P | Significant |
| --- | --- | --- | --- | --- | --- | --- | --- |
| Size | diameter 2-5 mm |  |  |  |  |  |  |
|  | diameter <2 mm | 0.254751 | 0.09409 | 0.681563 | 0.006405 | 0.041634 | TRUE |
|  | diameter >5 mm |  |  |  |  |  |  |
| Area | A: gastric antrum |  |  |  |  |  |  |
|  | B: gastric body | 0.555183 | 0.124839 | 2.205227 | 0.416347 | 0.999945 | FALSE |
|  | BA: gastric body and gastric antrum | 2696.997 | 0 | Inf | 0.999869 | 0.999945 | FALSE |
|  | GA: gastric angle | 5.482784 | 0.258785 | 290.5928 | 0.352601 | 0.999945 | FALSE |
|  | GAA: gastric angle and gastric antrum | 1.26E+09 | 0 | Inf | 0.999653 | 0.999945 | FALSE |
|  | GEJ: gastroesophageal junction | 0.609913 | 0.134243 | 2.562857 | 0.506316 | 0.999945 | FALSE |
|  | GEJ_B: junction of cardia and gastric body | 0.044512 | 0.001439 | 0.586503 | 0.034228 | 0.177988 | FALSE |
|  | P: pylorus | 1.82E+08 | 0 |  | 0.999685 | 0.999945 | FALSE |
| Degree of differentiation | G1: well differentiated |  |  |  |  |  |  |
|  | G1G2: well and moderately differentiated | 0.571023 | 0.177233 | 1.816754 | 0.341636 | 0.999945 | FALSE |
|  | G2: moderately differentiated | 1.218001 | 0.433082 | 3.369723 | 0.704067 | 0.999945 | FALSE |
| Physiology | AC: adenocarcinoma |  |  |  |  |  |  |
|  | SCC: squamous cell carcinoma | 7.49E-12 |  | Inf | 0.999576 | 0.999945 | FALSE |
| Lymph node metastasis | No |  |  |  |  |  |  |
|  | Yes | 0.311637 | 0.070457 | 1.293614 | 0.111026 | 0.453479 | FALSE |
| Depth of invasion | T1 |  |  |  |  |  |  |
|  | T2 | 0.176732 | 0.069524 | 0.413591 | 0.000119 | 0.00155 | TRUE |
|  | T3 | 8.10E-15 | 0 | 9.69E+32 | 0.990291 | 0.999945 | FALSE |
|  | T4 | 5.13E-09 | 0 | 3.43E+238 | 0.998748 | 0.999945 | FALSE |
| N_Stage | N0 |  |  |  |  |  |  |
|  | N1 | 0.36515 | 0.097759 | 1.308371191 | 0.12209 | 0.453479 | FALSE |
|  | N2 | 9.63E-09 | 0 | 2.01E+58 | 0.995665 | 0.999945 | FALSE |
|  | N3 | 3.35E-08 | 0 | 7.85E+137 | 0.998547 | 0.999945 | FALSE |
| M_Stage | M0 |  |  |  |  |  |  |
|  | M1 | 0.363768 | 0 | Inf | 0.999945 | 0.999945 | FALSE |
|  | Mx | 7298312 | 6.69E-33 | 8.24E+253 | 0.993305 | 0.999945 | FALSE |
